# Supplementary material
Source: PubMed Central journal article supplement (PMC7212534)
Supplement: TBSD_A_1757510_SM3952.pdf [file TBSD_A_1757510_SM3952.pdf]

## **Peptide-like and small-molecule inhibitors against Covid-19**

Suyash Pant<sup>1</sup>, Meenakshi Singh<sup>1</sup>, V. Ravichandiran<sup>1</sup>, USN Murty<sup>2</sup>, Hemant Kumar  
Srivastava<sup>2\*</sup>

<sup>1</sup>National Institute of Pharmaceutical Education and Research Kolkata Kolkata-700054, West  
Bengal, India

<sup>2</sup>National Institute of Pharmaceutical Education and Research Guwahati, Guwahati-781039,  
Assam, India, Email: hemantkrsri@gmail.com

**Table S1:** 300 selected compounds based on docking and MM-GBSA calculations

| <b>IDs</b>    | <b>Score</b> | <b>emodel</b> | <b><math>\Delta G</math> bind</b> | <b>IDs</b>    | <b>Score</b> | <b>emodel</b> | <b><math>\Delta G</math> bind</b> |
|---------------|--------------|---------------|-----------------------------------|---------------|--------------|---------------|-----------------------------------|
| 6Y2F#         | -12.20       | -152.88       | -84.48                            | ZINC14121618  | -6.57        | -67.21        | -69.95                            |
| <b>C-1</b>    | -11.02       | -120.87       | -104.89                           | CHEMBL3287610 | -6.57        | -84.43        | -83.88                            |
| <b>C-2</b>    | -9.58        | -111.13       | -89.08                            | ZINC17666408  | -6.55        | -90.82        | -51.83                            |
| ZINC06668537  | -9.50        | -81.46        | -85.95                            | CHEMBL480373  | -6.55        | -75.12        | -72.46                            |
| <b>C-3</b>    | -9.28        | -98.78        | -77.63                            | ZINC09465822  | -6.55        | -85.56        | -76.82                            |
| ZINC05225437  | -9.16        | -93.83        | -83.46                            | ZINC02801267  | -6.54        | -68.59        | -38.62                            |
| ZINC09601385  | -9.10        | -93.22        | -74.55                            | ZINC25047376  | -6.54        | -78.53        | -70.11                            |
| CHEMBL152104  | -9.09        | -73.20        | -78.03                            | ZINC11841973  | -6.53        | -77.90        | -75.18                            |
| ZINC09797971  | -8.89        | -78.47        | -64.31                            | ZINC33069086  | -6.52        | -75.04        | -71.93                            |
| ZINC01031116  | -8.84        | -70.63        | -57.98                            | ZINC14198502  | -6.51        | -73.12        | -67.89                            |
| CHEMBL573507  | -8.72        | -110.18       | -84.79                            | CHEMBL2028925 | -6.51        | -70.88        | -72.80                            |
| CHEMBL2371798 | -8.72        | -88.83        | -85.65                            | ZINC08710172  | -6.51        | -71.47        | -63.67                            |
| <b>C-4</b>    | -8.72        | -93.67        | -93.55                            | ZINC01060126  | -6.51        | -71.40        | -72.91                            |
| ZINC00702508  | -8.66        | -87.40        | -78.12                            | CHEMBL2376358 | -6.50        | -77.69        | -80.27                            |
| CHEMBL207579  | -8.56        | -111.34       | -76.61                            | ZINC30585960  | -6.49        | -75.30        | -65.17                            |
| CHEMBL422440  | -8.40        | -103.04       | -77.02                            | CHEMBL423112  | -6.48        | -68.85        | -82.37                            |
| ZINC08926270  | -8.21        | -70.64        | -85.44                            | ZINC12630368  | -6.48        | -71.30        | -61.96                            |
| ZINC01108942  | -8.20        | -83.66        | -61.22                            | ZINC06457619  | -6.47        | -67.62        | -63.35                            |
| ZINC07238596  | -8.16        | -90.99        | -71.00                            | ZINC04583765  | -6.46        | -69.95        | -63.28                            |
| CHEMBL40589   | -8.09        | -94.85        | -73.47                            | CHEMBL133803  | -6.45        | -102.82       | -75.55                            |
| ZINC12053378  | -8.05        | -88.25        | -81.30                            | ZINC12615632  | -6.44        | -59.98        | -62.73                            |
| ZINC29975718  | -8.02        | -78.69        | -56.88                            | ZINC21027072  | -6.43        | -82.36        | -57.91                            |
| ZINC32929983  | -7.97        | -82.35        | -76.11                            | ZINC01441524  | -6.42        | -68.73        | -62.75                            |
| ZINC03243503  | -7.91        | -76.36        | -66.77                            | ZINC12041166  | -6.42        | -64.60        | -67.82                            |
| ZINC09006550  | -7.90        | -83.78        | -50.77                            | CHEMBL26285   | -6.42        | -89.34        | -67.88                            |
| CHEMBL2396925 | -7.89        | -95.00        | -64.06                            | ZINC15863650  | -6.42        | -84.23        | -80.64                            |
| ZINC11166391  | -7.82        | -93.09        | -69.80                            | ZINC33539555  | -6.41        | -72.67        | -65.76                            |
| ZINC23566409  | -7.82        | -84.34        | -82.08                            | ZINC03143209  | -6.41        | -84.46        | -77.66                            |
| ZINC09934205  | -7.82        | -93.45        | -67.24                            | ZINC08542354  | -6.40        | -68.54        | -84.74                            |
| ZINC09343712  | -7.80        | -78.32        | -70.81                            | ZINC20745863  | -6.39        | -80.73        | -71.28                            |
| ZINC11909002  | -7.75        | -94.64        | -73.56                            | ZINC04196517  | -6.37        | -76.61        | -50.70                            |
| ZINC15532605  | -7.74        | -79.87        | -73.83                            | ZINC04857894  | -6.36        | -78.18        | -72.51                            |
| ZINC13127908  | -7.72        | -97.78        | -62.45                            | ZINC26687775  | -6.36        | -68.64        | -68.35                            |
| ZINC26538087  | -7.69        | -89.68        | -66.28                            | ZINC02462362  | -6.33        | -65.30        | -70.84                            |
| ZINC10912500  | -7.69        | -91.05        | -84.75                            | CHEMBL285306  | -6.33        | -81.65        | -65.70                            |
| ZINC09934141  | -7.68        | -76.72        | -77.00                            | ZINC08927286  | -6.32        | -83.23        | -64.60                            |
| ZINC03192567  | -7.67        | -89.71        | -70.62                            | ZINC02941457  | -6.30        | -68.93        | -44.73                            |
| ZINC09934209  | -7.66        | -105.46       | -111.29                           | ZINC25056522  | -6.30        | -79.42        | -71.76                            |
| ZINC14732819  | -7.57        | -75.20        | -65.42                            | ZINC09645121  | -6.29        | -76.59        | -67.94                            |
| ZINC09934211  | -7.57        | -97.07        | -87.67                            | ZINC07445512  | -6.28        | -76.54        | -65.43                            |
| CHEMBL158806  | -7.57        | -88.30        | -48.88                            | ZINC03280022  | -6.28        | -71.03        | -65.85                            |

| <b>IDs</b>   | <b>Score</b> | <b>emodel</b> | <b><math>\Delta G</math> bind</b> | <b>IDs</b>   | <b>Score</b> | <b>emodel</b> | <b><math>\Delta G</math> bind</b> |
|--------------|--------------|---------------|-----------------------------------|--------------|--------------|---------------|-----------------------------------|
| ZINC09426173 | -7.56        | -85.01        | -65.86                            | ZINC36049348 | -6.26        | -87.85        | -62.16                            |
| ZINC09415205 | -7.55        | -84.24        | -61.84                            | ZINC09659683 | -6.26        | -91.26        | -70.82                            |
| CHEMBL284545 | -7.54        | -96.49        | -88.31                            | ZINC20734697 | -6.26        | -86.11        | -83.19                            |
| CHEMBL130438 | -7.54        | -83.78        | -73.47                            | ZINC12442116 | -6.25        | -79.16        | -59.23                            |
| ZINC03350001 | -7.52        | -83.40        | -73.92                            | ZINC09957892 | -6.25        | -93.41        | -86.52                            |
| ZINC34797125 | -7.48        | -83.53        | -73.49                            | ZINC00629693 | -6.22        | -79.73        | -62.54                            |
| ZINC30731789 | -7.47        | -78.55        | -68.65                            | ZINC15072856 | -6.22        | -80.41        | -71.10                            |
| ZINC04373506 | -7.45        | -67.70        | -54.72                            | ZINC03374620 | -6.22        | -66.74        | -59.34                            |
| CHEMBL93357  | -7.44        | -105.41       | -89.89                            | ZINC30479921 | -6.21        | -71.37        | -51.86                            |
| ZINC12448605 | -7.44        | -82.47        | -49.35                            | ZINC12714597 | -6.20        | -68.18        | -62.30                            |
| CHEMBL303024 | -7.43        | -72.69        | -68.33                            | ZINC01299293 | -6.18        | -76.57        | -68.92                            |
| ZINC02648195 | -7.42        | -79.70        | -79.65                            | ZINC09112465 | -6.18        | -68.12        | -51.72                            |
| ZINC29132087 | -7.39        | -81.57        | -57.11                            | ZINC32481659 | -6.17        | -71.20        | -56.88                            |
| ZINC20744850 | -7.39        | -87.74        | -52.03                            | ZINC36009996 | -6.17        | -88.80        | -62.18                            |
| ZINC30765985 | -7.38        | -68.81        | -85.58                            | CHEMBL392031 | -6.16        | -74.59        | -51.46                            |
| ZINC15108667 | -7.38        | -94.96        | -67.68                            | ZINC25194263 | -6.16        | -81.94        | -87.37                            |
| ZINC14979914 | -7.35        | -83.86        | -73.59                            | ZINC29895751 | -6.15        | -78.02        | -57.68                            |
| ZINC25249923 | -7.34        | -69.36        | -65.72                            | ZINC33263659 | -6.15        | -94.45        | -75.30                            |
| ZINC08867239 | -7.34        | -94.83        | -63.73                            | ZINC09954459 | -6.15        | -70.34        | -74.88                            |
| CHEMBL466151 | -7.34        | -84.81        | -62.58                            | ZINC33025957 | -6.13        | -78.70        | -60.56                            |
| ZINC03584015 | -7.33        | -71.84        | -61.80                            | ZINC09008513 | -6.12        | -74.78        | -50.50                            |
| ZINC18271366 | -7.33        | -72.46        | -68.68                            | ZINC36061077 | -6.12        | -81.31        | -74.50                            |
| CHEMBL134131 | -7.33        | -99.85        | -81.15                            | ZINC01157055 | -6.11        | -75.98        | -83.95                            |
| ZINC08443457 | -7.32        | -84.86        | -77.05                            | ZINC08876900 | -6.11        | -81.16        | -91.52                            |
| ZINC09561809 | -7.31        | -83.42        | -77.00                            | ZINC33025952 | -6.11        | -77.30        | -89.75                            |
| ZINC12478562 | -7.29        | -84.18        | -62.43                            | ZINC09601385 | -6.08        | -87.73        | -69.31                            |
| CHEMBL424947 | -7.28        | -65.94        | -78.16                            | ZINC13324026 | -6.08        | -58.80        | -47.95                            |
| ZINC13785210 | -7.23        | -91.20        | -73.16                            | ZINC33025943 | -6.08        | -77.45        | -68.55                            |
| ZINC33067904 | -7.23        | -81.35        | -79.19                            | ZINC12146437 | -6.08        | -72.20        | -64.42                            |
| ZINC13693037 | -7.23        | -71.98        | -52.92                            | ZINC04710424 | -6.07        | -73.41        | -85.25                            |
| ZINC04520633 | -7.22        | -74.59        | -74.57                            | ZINC09418846 | -6.07        | -82.83        | -69.54                            |
| ZINC12728884 | -7.19        | -77.22        | -77.80                            | ZINC13000310 | -6.06        | -94.25        | -91.98                            |
| ZINC09934282 | -7.19        | -92.04        | -90.81                            | ZINC20729810 | -6.06        | -79.47        | -62.94                            |
| CHEMBL315390 | -7.18        | -99.97        | -79.65                            | ZINC22313846 | -6.06        | -69.40        | -67.37                            |
| ZINC29895854 | -7.18        | -79.22        | -64.59                            | ZINC08194046 | -6.03        | -83.00        | -67.80                            |
| ZINC11663735 | -7.17        | -65.79        | -72.76                            | ZINC33321018 | -6.03        | -84.65        | -87.29                            |
| ZINC16840308 | -7.17        | -84.25        | -84.96                            | ZINC01061058 | -6.03        | -81.94        | -56.15                            |
| ZINC01442374 | -7.17        | -76.53        | -77.74                            | ZINC12445469 | -6.03        | -73.23        | -80.99                            |
| ZINC12433690 | -7.15        | -65.96        | -57.22                            | ZINC04561360 | -6.03        | -79.84        | -80.84                            |
| ZINC24734228 | -7.14        | -96.14        | -75.15                            | ZINC22868152 | -6.03        | -78.07        | -70.00                            |
| CHEMBL346361 | -7.14        | -80.01        | -80.61                            | ZINC06669611 | -6.01        | -90.14        | -70.81                            |
| ZINC08880548 | -7.14        | -81.14        | -47.72                            | ZINC10912495 | -6.01        | -79.07        | -87.54                            |
| ZINC08867240 | -7.14        | -90.88        | -77.28                            | ZINC09484494 | -6.00        | -56.80        | -62.53                            |

| <b>IDs</b>    | <b>Score</b> | <b>emodel</b> | <b><math>\Delta G</math> bind</b> | <b>IDs</b>    | <b>Score</b> | <b>emodel</b> | <b><math>\Delta G</math> bind</b> |
|---------------|--------------|---------------|-----------------------------------|---------------|--------------|---------------|-----------------------------------|
| ZINC12420683  | -7.12        | -73.80        | -80.43                            | CHEMBL2178188 | -5.99        | -89.66        | -78.95                            |
| ZINC14732740  | -7.12        | -65.05        | -53.78                            | ZINC03391962  | -5.98        | -79.90        | -62.23                            |
| ZINC29895846  | -7.10        | -75.99        | -75.08                            | ZINC21038013  | -5.97        | -85.67        | -73.02                            |
| ZINC22193334  | -7.09        | -91.82        | -66.66                            | ZINC08767983  | -5.96        | -81.45        | -78.31                            |
| ZINC11791082  | -7.09        | -89.29        | -76.88                            | ZINC01878170  | -5.96        | -62.82        | -45.65                            |
| ZINC09969857  | -7.07        | -96.67        | -81.97                            | ZINC12150921  | -5.95        | -86.62        | -69.29                            |
| CHEMBL2028917 | -7.07        | -72.24        | -71.22                            | ZINC03144139  | -5.95        | -88.35        | -90.08                            |
| CHEMBL26286   | -7.06        | -87.65        | -57.76                            | ZINC33012857  | -5.95        | -75.57        | -85.95                            |
| ZINC29130815  | -7.06        | -68.77        | -69.51                            | ZINC33291900  | -5.94        | -90.40        | -76.61                            |
| ZINC04866918  | -7.03        | -69.11        | -68.64                            | CHEMBL3288163 | -5.94        | -67.88        | -74.73                            |
| ZINC12438679  | -7.03        | -82.62        | -86.31                            | ZINC05387788  | -5.93        | -63.22        | -62.65                            |
| ZINC09586630  | -7.02        | -79.73        | -63.66                            | ZINC12404176  | -5.93        | -63.21        | -77.33                            |
| ZINC20720647  | -7.01        | -84.15        | -69.30                            | ZINC08612270  | -5.93        | -90.24        | -87.95                            |
| ZINC31409555  | -7.00        | -80.24        | -69.76                            | ZINC12152825  | -5.92        | -78.02        | -81.43                            |
| ZINC27538983  | -6.98        | -81.35        | -70.70                            | ZINC05387787  | -5.90        | -69.15        | -66.46                            |
| ZINC12147439  | -6.97        | -64.74        | -62.03                            | ZINC08816065  | -5.90        | -74.01        | -97.90                            |
| ZINC03145822  | -6.96        | -72.78        | -56.57                            | ZINC05380960  | -5.88        | -56.16        | -51.41                            |
| ZINC12784896  | -6.96        | -71.81        | -76.22                            | ZINC02872512  | -5.88        | -54.83        | -46.33                            |
| ZINC15634716  | -6.96        | -65.69        | -65.22                            | ZINC09318607  | -5.87        | -65.02        | -67.80                            |
| ZINC08790010  | -6.95        | -74.90        | -69.58                            | CHEMBL206482  | -5.86        | -102.32       | -61.59                            |
| ZINC33263658  | -6.95        | -100.48       | -85.03                            | ZINC09057552  | -5.86        | -83.02        | -40.92                            |
| ZINC09001590  | -6.95        | -81.57        | -77.74                            | ZINC20732018  | -5.84        | -77.54        | -63.49                            |
| ZINC00720157  | -6.95        | -82.00        | -59.07                            | ZINC29895846  | -5.83        | -81.57        | -57.85                            |
| CHEMBL442612  | -6.94        | -92.71        | -52.53                            | ZINC14533959  | -5.83        | -80.41        | -80.41                            |
| ZINC08704911  | -6.93        | -80.36        | -65.44                            | ZINC21640961  | -5.83        | -60.54        | -57.49                            |
| ZINC27538985  | -6.90        | -73.79        | -76.47                            | ZINC09152779  | -5.81        | -70.37        | -59.93                            |
| ZINC05250880  | -6.89        | -74.49        | -58.81                            | ZINC25194255  | -5.80        | -81.61        | -80.91                            |
| ZINC18092155  | -6.88        | -69.57        | -49.72                            | ZINC03000060  | -5.80        | -71.77        | -58.07                            |
| ZINC00678096  | -6.87        | -91.41        | -60.81                            | CHEMBL285585  | -5.79        | -95.51        | -60.91                            |
| ZINC02721017  | -6.87        | -64.49        | -39.83                            | ZINC36086055  | -5.78        | -74.76        | -70.08                            |
| ZINC09128597  | -6.87        | -79.46        | -76.72                            | ZINC09409939  | -5.78        | -79.10        | -86.93                            |
| CHEMBL196990  | -6.87        | -96.77        | -71.32                            | ZINC03257715  | -5.78        | -73.60        | -56.68                            |
| ZINC01442373  | -6.86        | -77.72        | -82.16                            | ZINC03558194  | -5.77        | -86.53        | -69.09                            |
| ZINC27538980  | -6.86        | -84.10        | -68.24                            | ZINC02228025  | -5.77        | -66.14        | -65.44                            |
| ZINC11820489  | -6.85        | -80.03        | -73.82                            | ZINC10616133  | -5.76        | -60.01        | -72.25                            |
| ZINC23485296  | -6.84        | -84.15        | -91.45                            | ZINC33025903  | -5.76        | -74.62        | -78.22                            |
| ZINC13022096  | -6.83        | -67.59        | -80.25                            | ZINC09485226  | -5.75        | -80.72        | -81.20                            |
| ZINC08583708  | -6.82        | -91.49        | -65.25                            | ZINC15084955  | -5.72        | -77.55        | -58.66                            |
| ZINC09934213  | -6.82        | -92.53        | -72.74                            | ZINC30903371  | -5.71        | -67.38        | -52.21                            |
| ZINC12370971  | -6.81        | -75.15        | -76.88                            | ZINC01077780  | -5.69        | -76.01        | -62.38                            |
| CHEMBL2371797 | -6.81        | -95.61        | -90.41                            | ZINC03058214  | -5.69        | -74.15        | -64.06                            |
| ZINC21649976  | -6.80        | -85.59        | -63.58                            | CHEMBL1230065 | -5.68        | -84.95        | -70.76                            |
| ZINC27663088  | -6.80        | -76.32        | -77.23                            | ZINC12252277  | -5.68        | -74.79        | -59.19                            |

| IDs          | Score | emodel  | $\Delta G$ bind | IDs          | Score | emodel | $\Delta G$ bind |
|--------------|-------|---------|-----------------|--------------|-------|--------|-----------------|
| ZINC26889990 | -6.80 | -74.30  | -66.45          | ZINC06142224 | -5.68 | -84.62 | -59.93          |
| ZINC09664063 | -6.80 | -72.50  | -65.43          | ZINC00960048 | -5.67 | -72.76 | -65.37          |
| ZINC13027874 | -6.79 | -90.37  | -67.51          | ZINC15679848 | -5.67 | -65.57 | -66.92          |
| ZINC03626921 | -6.77 | -72.88  | -53.45          | ZINC09262267 | -5.67 | -83.13 | -53.86          |
| ZINC33057728 | -6.77 | -82.62  | -64.47          | ZINC32724155 | -5.66 | -73.95 | -54.52          |
| ZINC20574379 | -6.76 | -82.75  | -62.68          | ZINC09877598 | -5.66 | -79.33 | -58.22          |
| ZINC08583708 | -6.75 | -86.93  | -69.00          | ZINC12686569 | -5.66 | -73.17 | -90.02          |
| ZINC34831394 | -6.74 | -81.27  | -89.44          | ZINC09031542 | -5.65 | -65.51 | -44.88          |
| ZINC09224066 | -6.73 | -83.41  | -63.19          | ZINC12712423 | -5.63 | -71.48 | -64.13          |
| ZINC05526887 | -6.70 | -65.89  | -57.94          | ZINC12035928 | -5.61 | -75.10 | -46.34          |
| CHEMBL204540 | -6.69 | -71.37  | -66.06          | ZINC15767769 | -5.59 | -69.36 | -64.52          |
| ZINC08662068 | -6.68 | -84.18  | -61.86          | ZINC16993657 | -5.57 | -72.66 | -52.37          |
| ZINC09883605 | -6.67 | -85.16  | -59.90          | CHEMBL561734 | -5.55 | -74.24 | -64.54          |
| ZINC17598974 | -6.67 | -80.57  | -56.35          | ZINC35354266 | -5.54 | -70.93 | -51.18          |
| ZINC09598771 | -6.66 | -75.75  | -60.56          | ZINC11162302 | -5.54 | -90.72 | -52.59          |
| ZINC11614597 | -6.66 | -70.83  | -64.22          | ZINC08856275 | -5.53 | -72.12 | -77.56          |
| ZINC21037410 | -6.66 | -83.47  | -69.40          | ZINC01432842 | -5.53 | -66.54 | -49.37          |
| ZINC21639175 | -6.65 | -87.92  | -67.90          | ZINC19696231 | -5.52 | -68.58 | -51.22          |
| ZINC06809320 | -6.64 | -54.96  | -57.25          | ZINC20095139 | -5.51 | -81.94 | -70.27          |
| ZINC34789480 | -6.61 | -81.15  | -89.53          | ZINC01059896 | -5.50 | -69.31 | -76.79          |
| ZINC09442002 | -6.60 | -101.65 | -62.15          | ZINC32641706 | -5.49 | -72.33 | -80.39          |
| ZINC32643347 | -6.58 | -69.78  | -66.60          | ZINC32645018 | -5.48 | -70.74 | -74.30          |
| ZINC32929984 | -6.58 | -79.46  | -67.86          | ZINC12314057 | -5.46 | -68.79 | -60.91          |

#Co-crystalized ligand of PDB-ID 6Y2F

CHEMBL shows compounds selected from CHEMBL database

ZINC shows compounds selected from ZINC15 database

IDs are compound IDs from databases

The score is the glide docking score

emodel is the glide emodel score

$\Delta G$ -bind is MM-GBSA based binding free energy

**C-1:** CHEMBL206650; **C-2:** CHEMBL303543; **C-3:** CHEMBL127888; **C-4:** CHEMBL573507 (these four compounds were selected for MD simulations)

**Table S2:** Name of FDA selected approved drugs for repurposing against Covid-19

| IDs                 | Score | emodel  | $\Delta G$ bind | IDs            | Score | emodel | $\Delta G$ bind |
|---------------------|-------|---------|-----------------|----------------|-------|--------|-----------------|
| 6W63 <sup>#</sup>   | -5.99 | -58.64  | -52.57          | Abacavir       | -6.56 | -51.49 | -44.95          |
| Cobicistat          | -9.35 | -107.34 | -80.01          | Betaxolol      | -6.56 | -57.50 | -63.01          |
| Oxytocin            | -9.29 | -74.72  | -68.29          | Pitavastatin   | -6.56 | -55.61 | -40.79          |
| Ritonavir           | -8.88 | -106.65 | -67.65          | Chlorthalidone | -6.56 | -63.55 | -38.58          |
| Teniposide          | -8.43 | -46.10  | -54.79          | Ruxolitinib    | -6.53 | -51.11 | -42.56          |
| Lopinavir           | -8.36 | -86.41  | -73.33          | Apixaban       | -6.52 | -66.20 | -60.40          |
| Dobutamine          | -8.15 | -60.50  | -62.66          | Avanafil       | -6.47 | -71.64 | -54.42          |
| Nelfinavir mesylate | -8.13 | -80.50  | -77.12          | Apicidine      | -6.39 | -68.28 | -55.56          |
| Formoterol          | -8.05 | -66.82  | -64.27          | Zileuton       | -6.35 | -46.86 | -38.20          |
| Pentagastrin        | -8.04 | -90.84  | -73.95          | Lorazepam      | -6.34 | -51.40 | -44.25          |
| Latanoprost         | -7.82 | -63.81  | -57.43          | Lacosamide     | -6.32 | -52.30 | -40.12          |
| Octreotide acetate  | -7.79 | -77.15  | -60.41          | Cefuroxime     | -6.29 | -53.34 | -34.59          |
| Pravastatin sodium  | -7.74 | -54.54  | -39.18          | Levorphanol    | -6.29 | -39.12 | -53.29          |
| Cangrelor           | -7.72 | -81.40  | -51.27          | Mebendazole    | -6.18 | -62.52 | -58.10          |
| Protirelin          | -7.70 | -77.40  | -57.95          | Amlodipine     | -6.18 | -53.53 | -51.72          |
| Fluvastatin         | -7.35 | -56.40  | -41.43          | Trandolapril   | -6.15 | -59.10 | -32.16          |
| Ipratropium bromide | -7.34 | -53.77  | -55.03          | Estradiol      | -6.12 | -47.15 | -45.18          |
| Darunavir           | -7.21 | -69.20  | -64.49          | Cephalexin     | -6.11 | -52.26 | -40.52          |
| Carfilzomib         | -7.20 | -85.26  | -79.74          | Rotigotine     | -6.09 | -49.33 | -57.93          |
| Hydroxyzine pamoate | -7.08 | -57.43  | -33.62          | Testosterone   | -6.00 | -49.41 | -47.07          |
| Dipyridamole        | -7.07 | -60.39  | -72.81          | Fenofibrate    | -5.99 | -52.18 | -35.63          |
| Pergolide mesylate  | -7.06 | -67.70  | -68.79          | Mesoridazine   | -5.99 | -59.15 | -63.10          |
| Podofilox           | -6.99 | -59.11  | -69.97          | Temazepam      | -5.94 | -47.74 | -38.06          |
| Saquinavir          | -6.98 | -89.99  | -72.08          | Levallorphan   | -5.93 | -40.84 | -45.79          |
| Labetalol           | -6.96 | -58.30  | -39.02          | Nimodipine     | -5.67 | -73.60 | -68.42          |
| Fluvoxamine maleate | -6.94 | -49.20  | -53.58          | Lisinopril     | -5.64 | -59.20 | -36.54          |
| Enalapril maleate   | -6.83 | -57.19  | -41.72          | Cephadrine     | -5.64 | -53.22 | -38.04          |
| Pyruvium pamoate    | -6.83 | -58.25  | -33.91          | Olopatadine    | -5.61 | -50.72 | -38.26          |
| Cabergoline         | -6.71 | -76.53  | -71.46          | Boceprevir     | -5.59 | -52.48 | -65.46          |
| Epirubicin          | -6.67 | -68.46  | -70.85          | Zaleplon       | -5.59 | -50.55 | -47.66          |
| Etidocaine          | -6.66 | -52.09  | -50.14          | Metolazone     | -5.56 | -60.21 | -56.25          |
| Fluorometholone     | -6.64 | -57.71  | -50.77          | Lansoprazole   | -5.42 | -54.46 | -48.22          |
| Ascorbic acid       | -6.63 | -33.92  | -30.52          | Moexipril      | -5.41 | -55.33 | -45.59          |

<sup>#</sup>Co-crystallized ligand of PDB-ID 6W63

The score is the glide docking score

emodel is the glide emodel score

$\Delta G$ -bind is MM-GBSA based binding free energy

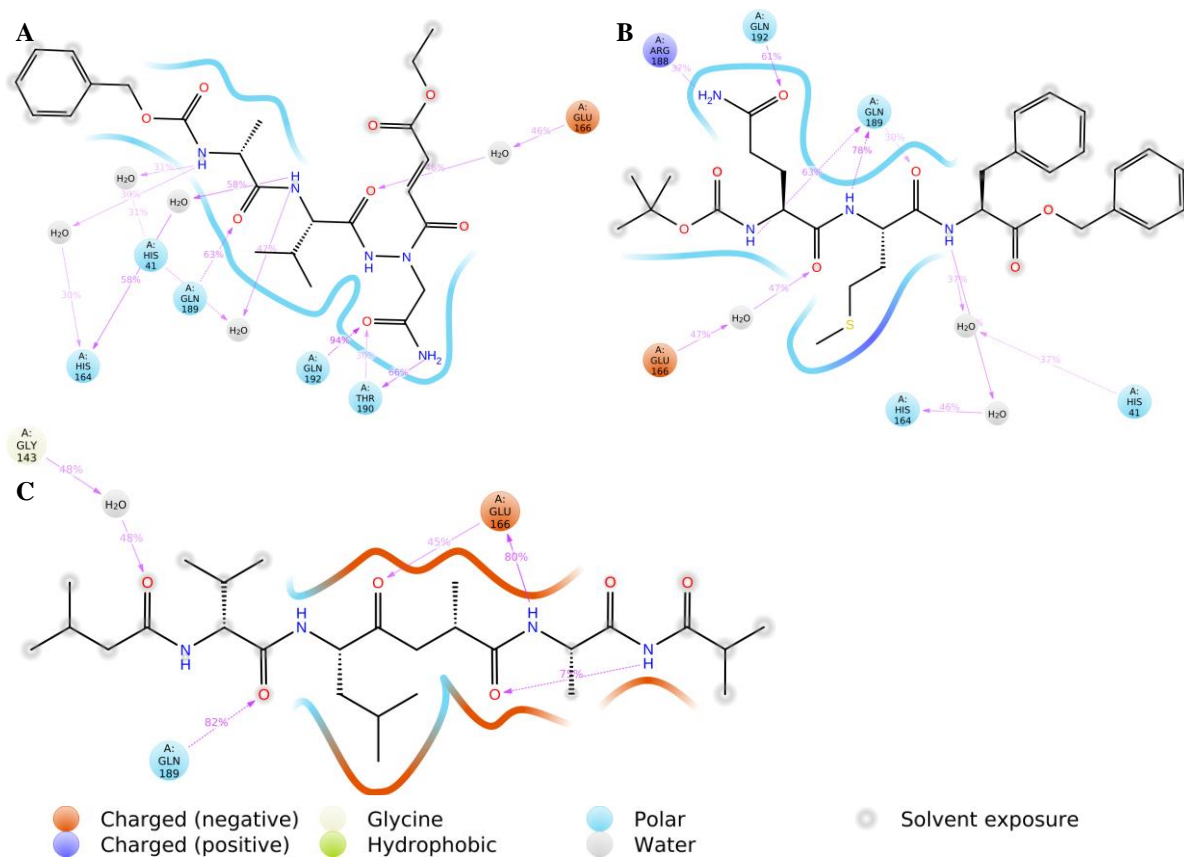

**Figure S1:** Hydrogen bond interaction network during 20ns of molecular dynamics simulations for C-2 (A), C-3 (B), and C-4 (C).

C-2: CHEMBL303543; C-3: CHEMBL127888; C-4: CHEMBL573507
